# Supplementary material for: Quantitative assessment of polymorphisms in H19 lncRNA and cancer risk: a meta-analysis of 13,392 cases and 18,893 controls
Source: PubMed Central journal article supplement (PMC5346665; doi:10.18632/oncotarget.12530), 2016-10-08
Supplement: oncotarget-07-78631-s001.pdf [file oncotarget-07-78631-s001.pdf]

## Quantitative assessment of polymorphisms in *H19* lncRNA and cancer risk: a meta-analysis of 13,392 cases and 18,893 controls

### Supplementary Materials

**Supplementary Table S1: Newcastle-Ottawa quality assessment scale for each included study**

| Studies         | Selection                |                                 |                       | Comparability          |                    |                                                   | Exposure                  |                                 |                    | Total quality score |
|-----------------|--------------------------|---------------------------------|-----------------------|------------------------|--------------------|---------------------------------------------------|---------------------------|---------------------------------|--------------------|---------------------|
|                 | Case definition adequate | Representativeness of the cases | Selection of controls | Definition of controls | Adjustment for age | Adjustment for lifestyle/traditional risk factors | Ascertainment of exposure | Uniform method of ascertainment | Non-responder rate |                     |
| Hua             | 1                        | 1                               | 0                     | 1                      | 1                  | 1                                                 | 1                         | 1                               | 0                  | 7                   |
| Li              | 1                        | 1                               | 1                     | 1                      | 1                  | 1                                                 | 1                         | 1                               | 1                  | 9                   |
| Xia             | 1                        | 1                               | 1                     | 1                      | 1                  | 1                                                 | 1                         | 1                               | 1                  | 9                   |
| Gong            | 1                        | 1                               | 0                     | 1                      | 1                  | 0                                                 | 1                         | 1                               | 0                  | 6                   |
| Yang            | 1                        | 1                               | 0                     | 1                      | 1                  | 1                                                 | 1                         | 1                               | 1                  | 8                   |
| Butt            | 1                        | 1                               | 1                     | 1                      | 1                  | 1                                                 | 1                         | 1                               | 0                  | 8                   |
| Barnholtz-Sloan | 1                        | 1                               | 1                     | 1                      | 1                  | 0                                                 | 1                         | 1                               | 0                  | 7                   |
| Quaye           | 1                        | 1                               | 1                     | 1                      | 0                  | 0                                                 | 1                         | 1                               | 0                  | 6                   |
| Song            | 1                        | 1                               | 1                     | 1                      | 1                  | 0                                                 | 1                         | 1                               | 0                  | 7                   |
| Verhaegh        | 1                        | 1                               | 1                     | 1                      | 1                  | 1                                                 | 1                         | 1                               | 1                  | 9                   |

**Supplementary Table S2: Distributions of the genotypes and alleles of the *H19* rs2107425 polymorphism**

| Number | First Author    | Frequency distributions of the genotypes |              |             |              |              |             | HWE <sup>a</sup> |
|--------|-----------------|------------------------------------------|--------------|-------------|--------------|--------------|-------------|------------------|
|        |                 | Case                                     |              |             | Control      |              |             |                  |
|        |                 | CC<br>N (%)                              | CT<br>N (%)  | TT<br>N (%) | CC<br>N (%)  | CT<br>N (%)  | TT<br>N (%) |                  |
| 1      | Gong            | 181 (3.92)                               | 235 (5.79)   | 63 (5.66)   | 79 (1.25)    | 96 (1.58)    | 28 (1.89)   | 0.89             |
| 2      | Butt            | 191 (4.14)                               | 120 (2.95)   | 35 (3.14)   | 329 (5.19)   | 304 (5.00)   | 78 (5.26)   | 0.54             |
| 3      | Barnholtz-Sloan | 765 (16.58)                              | 906 (22.30)  | 291 (26.15) | 691 (10.91)  | 817 (13.44)  | 268 (18.08) | 0.30             |
| 4      | Quaye           | 767 (16.62)                              | 544 (13.39)  | 149 (13.39) | 1118 (17.65) | 1098 (18.07) | 247 (16.67) | 0.34             |
| 5      | Song            | 2619 (56.75)                             | 2192 (53.96) | 555 (49.87) | 4029 (63.60) | 3667 (60.33) | 842 (56.82) | 0.86             |
| 6      | Verhaegh        | 92 (1.99)                                | 65 (1.60)    | 20 (1.80)   | 89 (1.40)    | 96 (1.58)    | 19 (1.28)   | 0.34             |

<sup>a</sup>Hardy-Weinberg equilibrium (HWE) in control subjects.

**Supplementary Table S3: Distributions of the genotypes and alleles of the *H19* rs2839698 polymorphism**

| Number | First Author | Frequency distributions of the genotypes |             |             |             |             |             | HWE <sup>a</sup> |
|--------|--------------|------------------------------------------|-------------|-------------|-------------|-------------|-------------|------------------|
|        |              | Case                                     |             |             | Control     |             |             |                  |
|        |              | GG<br>N (%)                              | GA<br>N (%) | AA<br>N (%) | GG<br>N (%) | GA<br>N (%) | AA<br>N (%) |                  |
| 1      | Hua          | 552 (32.94)                              | 418 (30.53) | 79 (24.38)  | 729 (39.84) | 565 (40.53) | 103 (36.01) | 0.65             |
| 2      | Li           | 583 (34.79)                              | 462 (33.75) | 102 (31.48) | 666 (36.39) | 462 (33.14) | 75 (26.22)  | 0.67             |
| 3      | Gong         | 237 (14.14)                              | 220 (16.07) | 39 (12.04)  | 99 (5.41)   | 80 (5.74)   | 27 (9.44)   | 0.10             |
| 4      | Yang         | 250 (14.92)                              | 195 (14.24) | 55 (16.98)  | 284 (15.52) | 178 (12.77) | 38 (13.29)  | 0.18             |
| 5      | Verhaegh     | 54 (3.22)                                | 74 (5.41)   | 49 (15.12)  | 52 (2.84)   | 109 (7.82)  | 43 (15.03)  | 0.31             |

<sup>a</sup>Hardy-Weinberg equilibrium (HWE) in control subjects.

**Supplementary Table S4: Distributions of the genotypes and alleles of the *H19* rs217727 polymorphism**

| Number | First Author | Frequency distributions of the genotypes |             |             |             |             |             | HWE <sup>a</sup> |
|--------|--------------|------------------------------------------|-------------|-------------|-------------|-------------|-------------|------------------|
|        |              | Case                                     |             |             | Control     |             |             |                  |
|        |              | GG<br>N (%)                              | GA<br>N (%) | AA<br>N (%) | GG<br>N (%) | GA<br>N (%) | AA<br>N (%) |                  |
| 1      | Hua          | 431 (32.04)                              | 467 (32.25) | 148 (27.36) | 573 (38.82) | 665 (37.55) | 156 (29.94) | 0.07             |
| 2      | Li           | 480 (35.69)                              | 514 (35.50) | 153 (28.28) | 456 (30.89) | 570 (32.19) | 177 (33.97) | 0.96             |
| 3      | Xia          | 160 (11.90)                              | 156 (10.77) | 148 (27.36) | 139 (9.42)  | 212 (11.97) | 116 (22.26) | 0.05             |
| 4      | Yang         | 160 (11.90)                              | 252 (17.40) | 88 (16.27)  | 193 (13.08) | 244 (13.78) | 63 (12.09)  | 0.30             |
| 5      | Verhaegh     | 114 (8.48)                               | 59 (4.07)   | 4 (0.74)    | 115 (7.79)  | 80 (4.52)   | 9 (1.73)    | 0.29             |

<sup>a</sup>Hardy-Weinberg equilibrium (HWE) in control subjects.

**Supplementary Table S5: Sensitivity analysis of rs217727 in dominant model**

| Study omitted   | Cancer type | OR (95%CI)       | <i>P</i> | <i>P</i> for heterogeneity | <i>I</i> <sup>2</sup> |
|-----------------|-------------|------------------|----------|----------------------------|-----------------------|
| Hua (2016)      | bladder     | 0.91 (0.71–1.18) | 0.478    | 0.011                      | 73.00%                |
| Li (2016)       | colorectal  | 0.96 (0.76–1.22) | 0.745    | 0.022                      | 68.90%                |
| Xia (2016)      | breast      | 0.97 (0.78–1.19) | 0.753    | 0.015                      | 71.40%                |
| Yang (2015)     | gastric     | 0.89 (0.80–0.99) | 0.025    | 0.290                      | 19.90%                |
| Verhaegh (2008) | bladder     | 0.97 (0.80–1.17) | 0.755    | 0.018                      | 70.30%                |

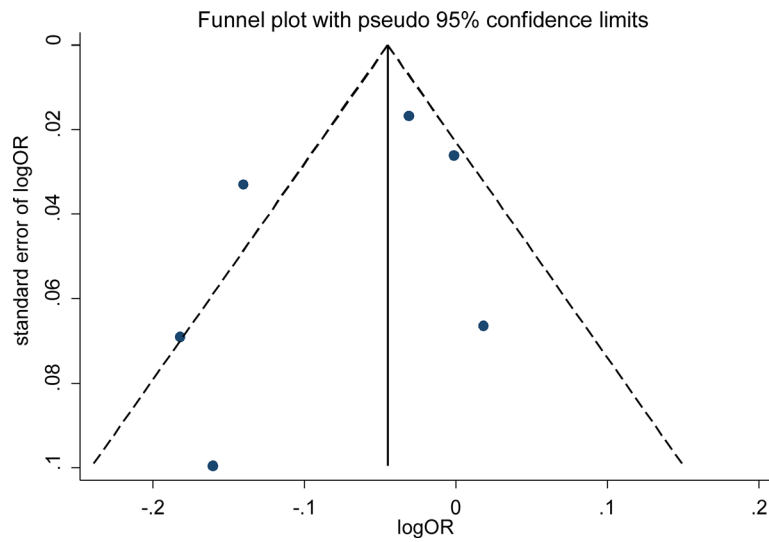

Supplementary Figure S1: Funnel plot for publication bias of the *H19* rs2107425 polymorphism and cancer risk under dominant model (Funnel plot with pseudo 95% confidence limits was used).

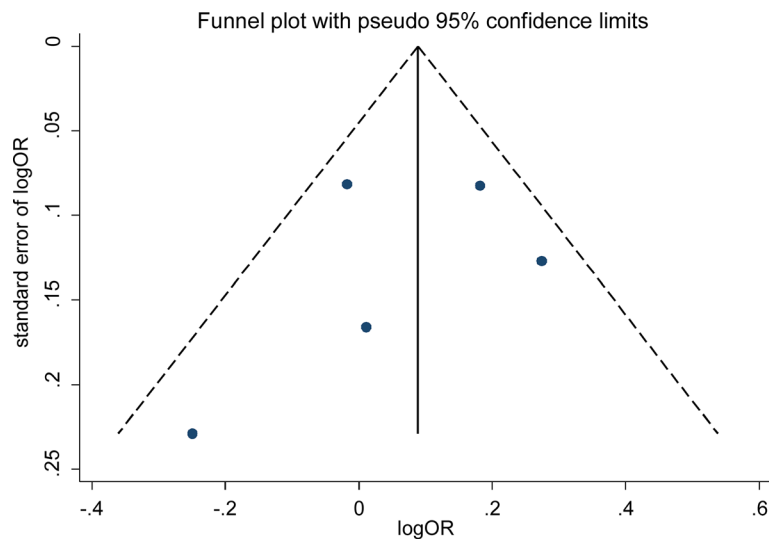

Supplementary Figure S2: Funnel plot for publication bias of the *H19* rs2839698 polymorphism and cancer risk under dominant model (Funnel plot with pseudo 95% confidence limits was used).

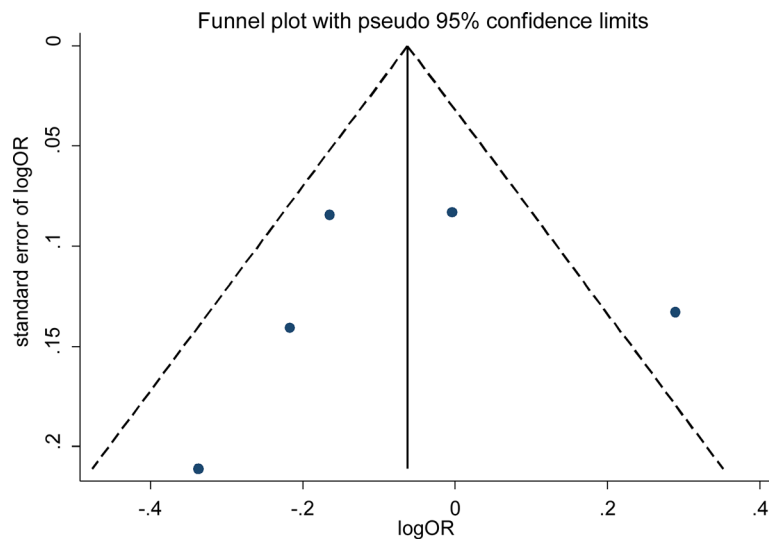

**Supplementary Figure S3: Funnel plot for publication bias of the *H19* rs217727 polymorphism and cancer risk under dominant model (Funnel plot with pseudo 95% confidence limits was used).**
